# Supplementary material
Source: PubMed Central journal article supplement (PMC2920365)
Supplement: NIHMS208061-supplement-Supp_fig_s1-s6.pdf [file NIHMS208061-supplement-Supp_fig_s1-s6.pdf]

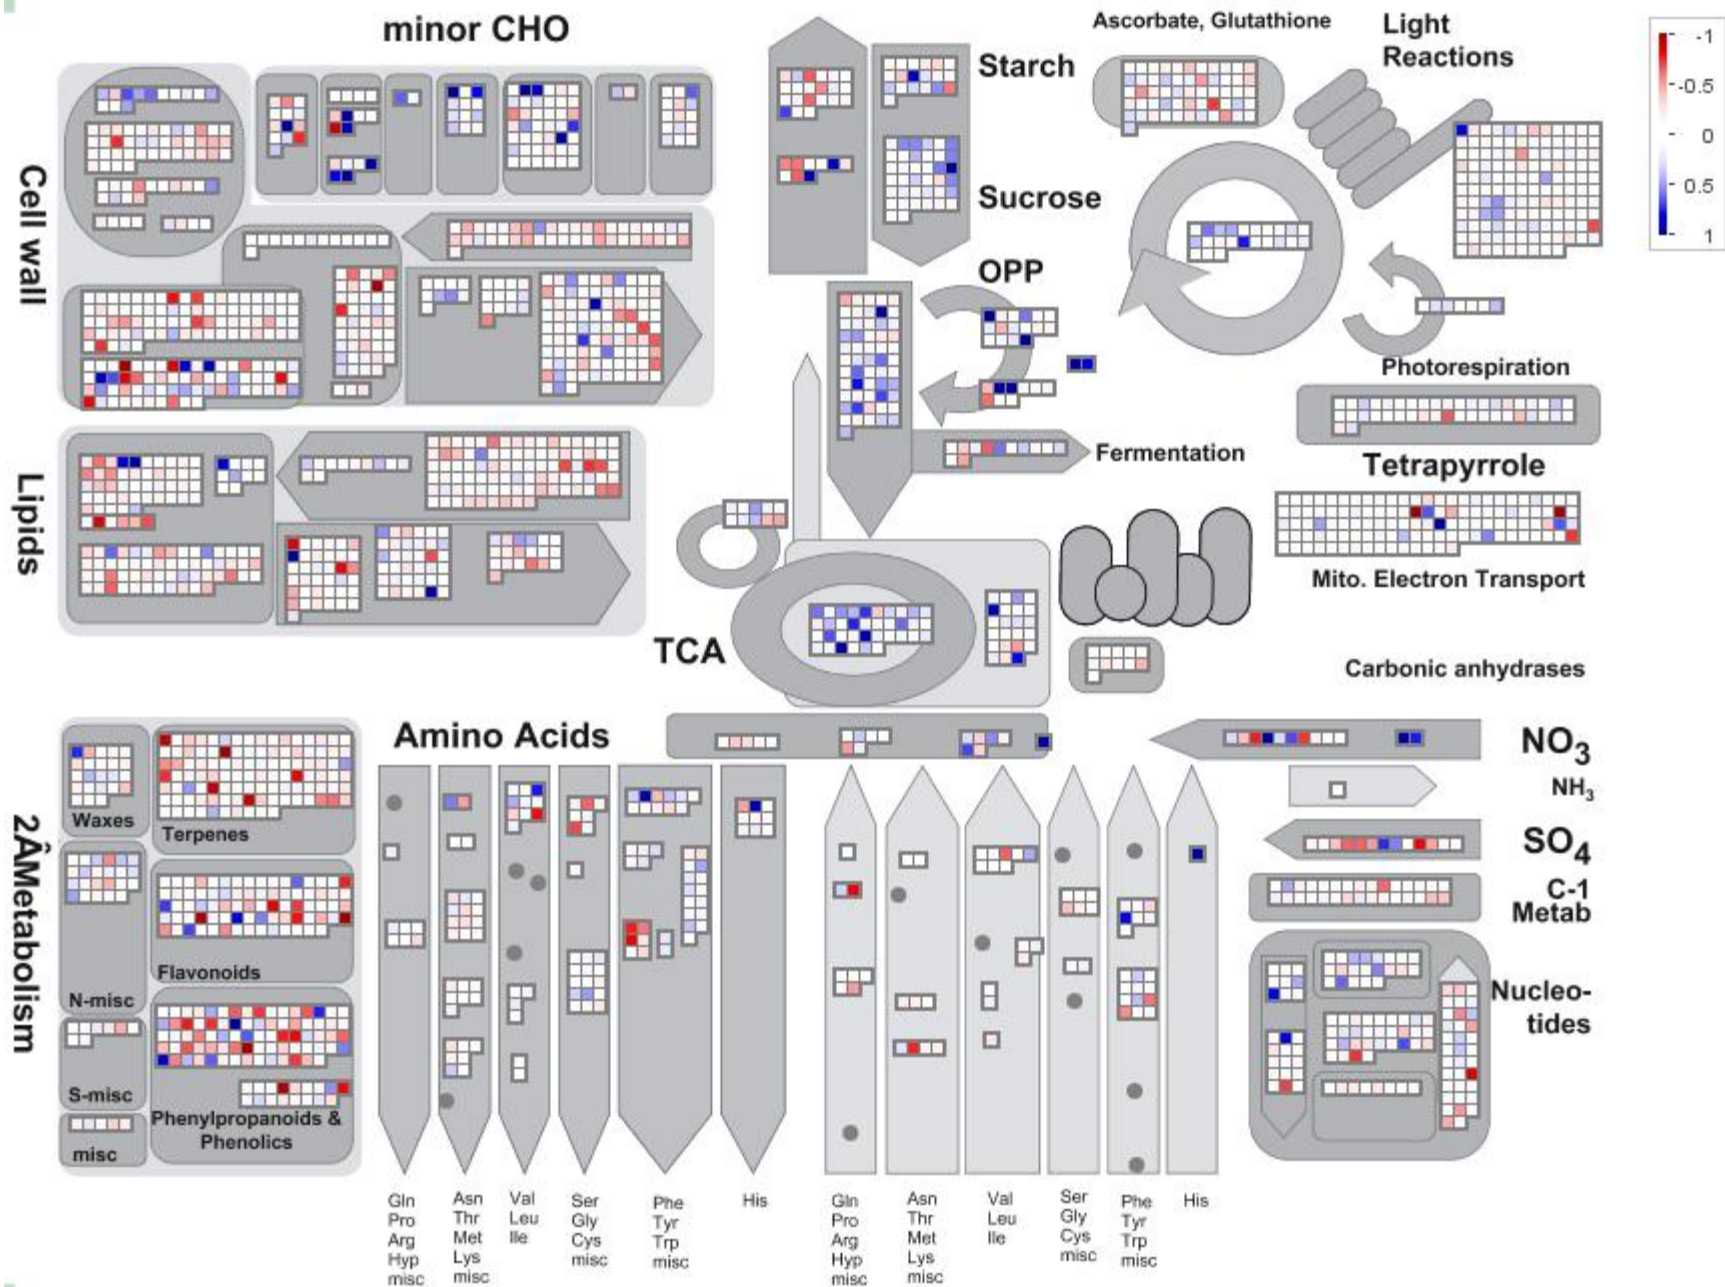

**Supplemental Figure S1:** Overlay of expression data from the nitrate-specific gene set combined with genes displaying no significant change in expression (all 8 h time point) onto a metabolic overview map using MapMan software (Usadel et al., 2005). Note that the values on the scale are  $\log_2$  transformed.

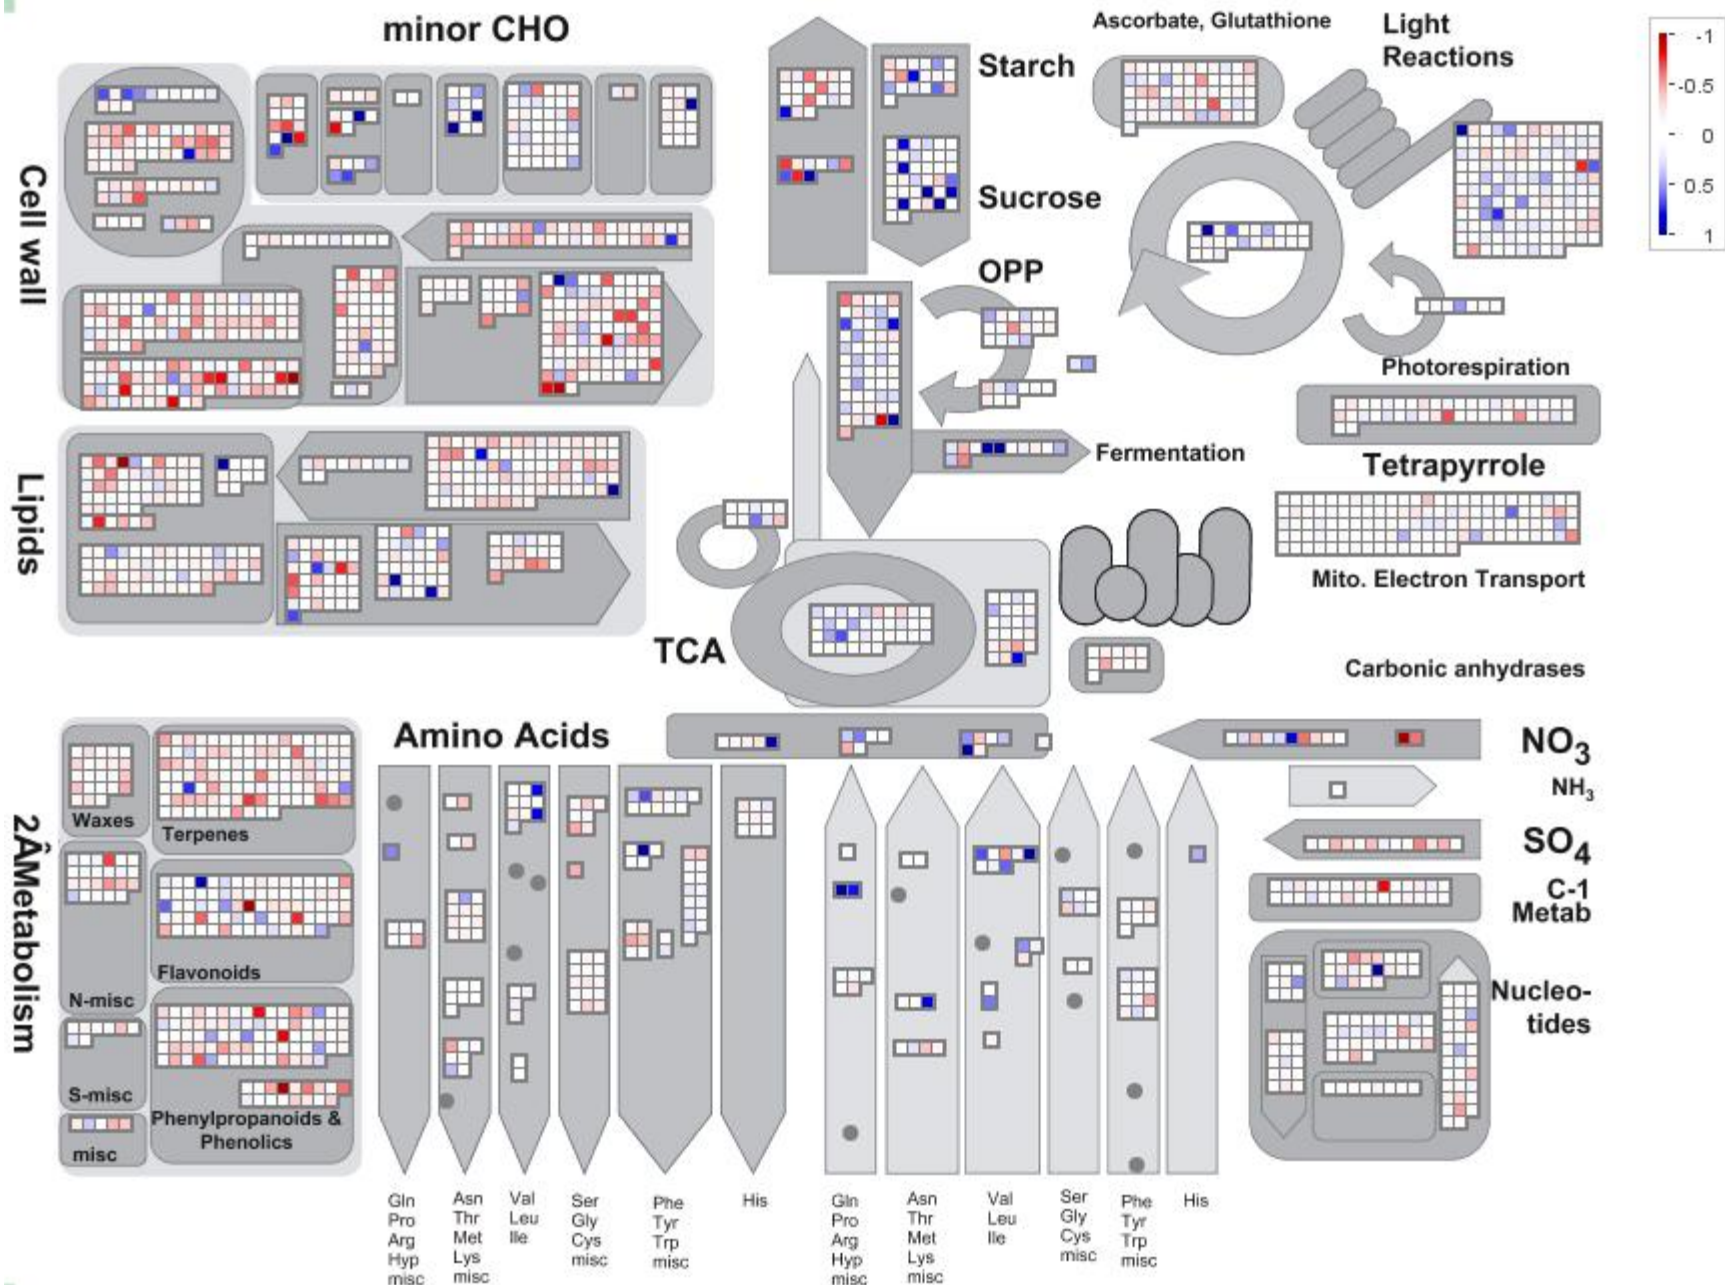

**Supplemental Figure S2:** Overlay of expression data from the ammonium-specific gene set combined with genes displaying no significant change in expression (all 8 h time point) onto a metabolic overview map using MapMan software (Usadel et al., 2005). Note that the values on the scale are  $\log_2$  transformed.

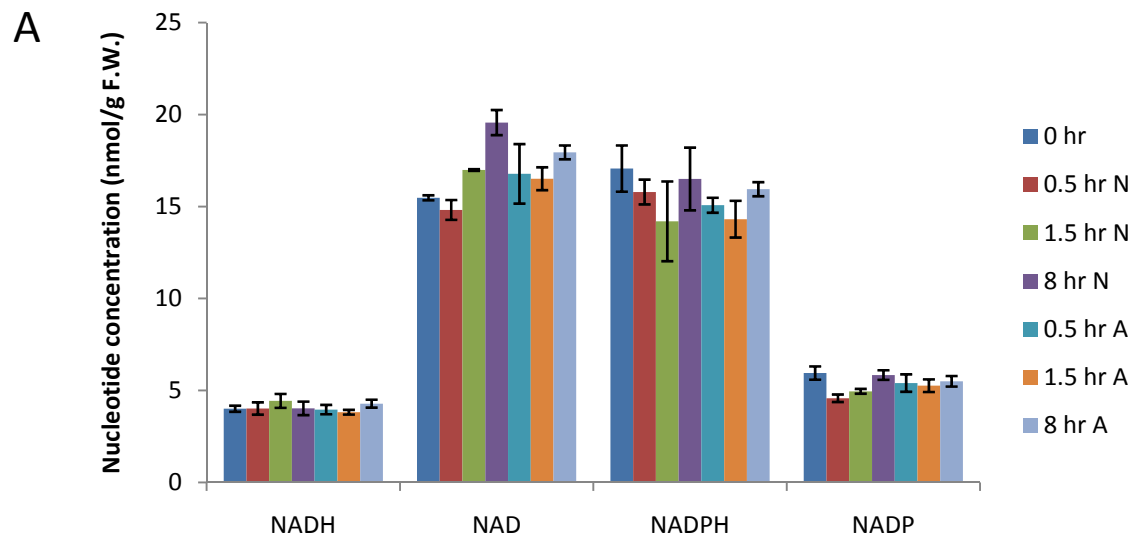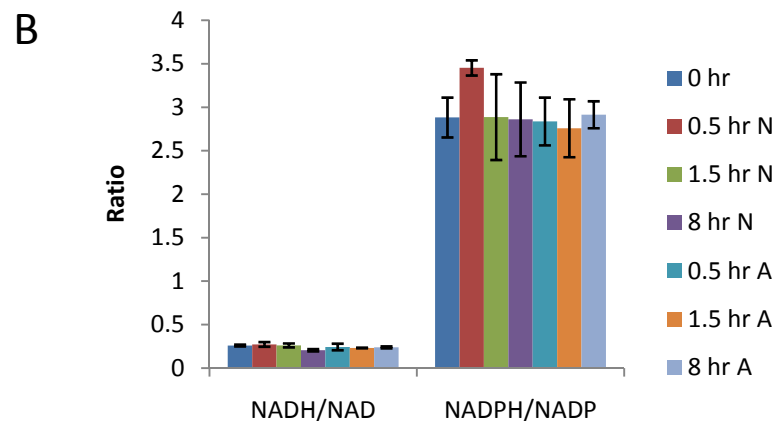

**Supplemental Figure S3:** Determination of the concentration and oxidation state of the NAD(H) and NADP(H) pools in *Arabidopsis* roots. Nitrogen-limited plants were supplied with either ammonium (A) or nitrate (N) for the time periods indicated. Panel A displays absolute concentrations of NAD(H) and NADP(H) and panel B displays the ratio of reduced form : oxidized form. Data are presented as means  $\pm$  SEM from three independent experimental replicates.

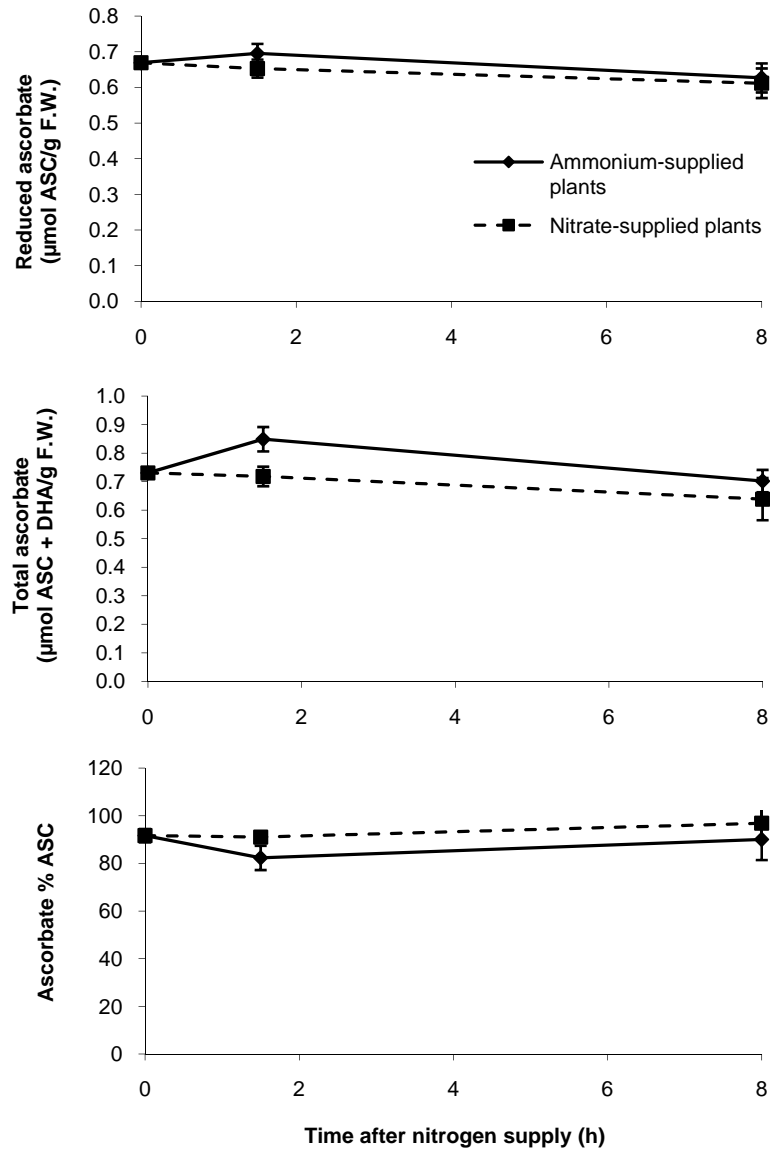

**Supplemental Figure S4:** Determination of the concentration and oxidation state of ascorbate in *Arabidopsis* roots. Nitrogen-limited plants were supplied with either ammonium or nitrate for the time periods indicated. Panel A displays the concentration of reduced ascorbate (ASC) and panel B displays the concentration of total ascorbate (ASC + dehydroascorbate [DHA]). Panel C shows the percentage of the ascorbate pool that is in the reduced form. Data are presented as means  $\pm$  SEM from three independent experimental replicates.

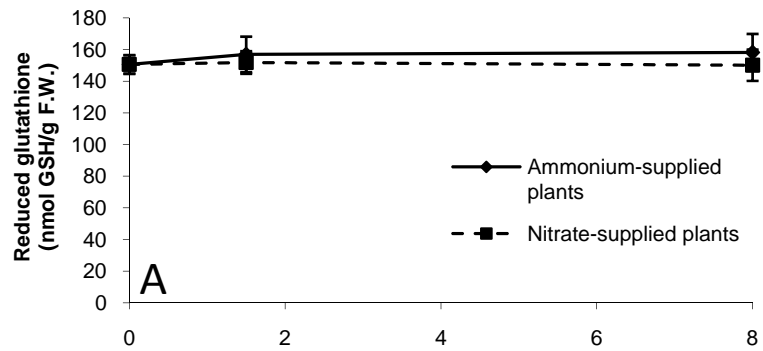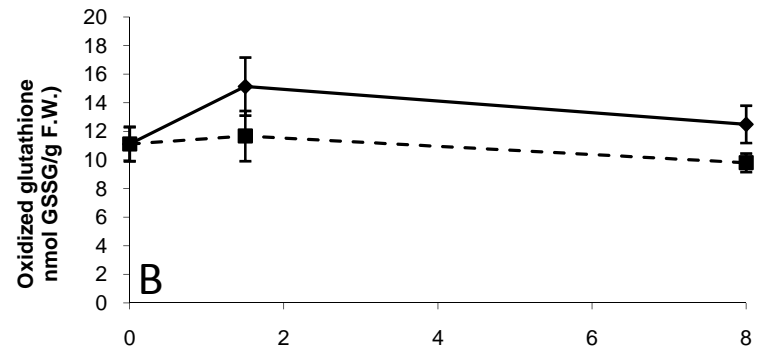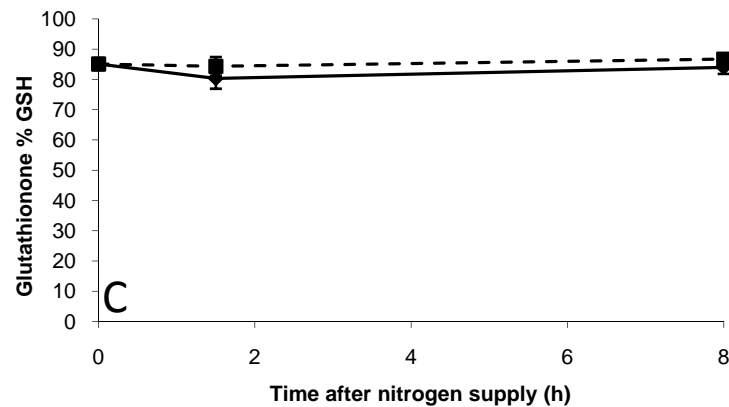

**Supplemental Figure S5:** Determination of the concentration and oxidation state of glutathione in *Arabidopsis* roots. Nitrogen-limited plants were supplied with either ammonium or nitrate for the time periods indicated. Panel A displays the concentration of reduced glutathione (GSH) and panel B displays the concentration of oxidized glutathione (GSSG). Panel C shows the percentage of the glutathione pool that is in the reduced form. Data are presented as means  $\pm$  SEM from three independent experimental replicates.

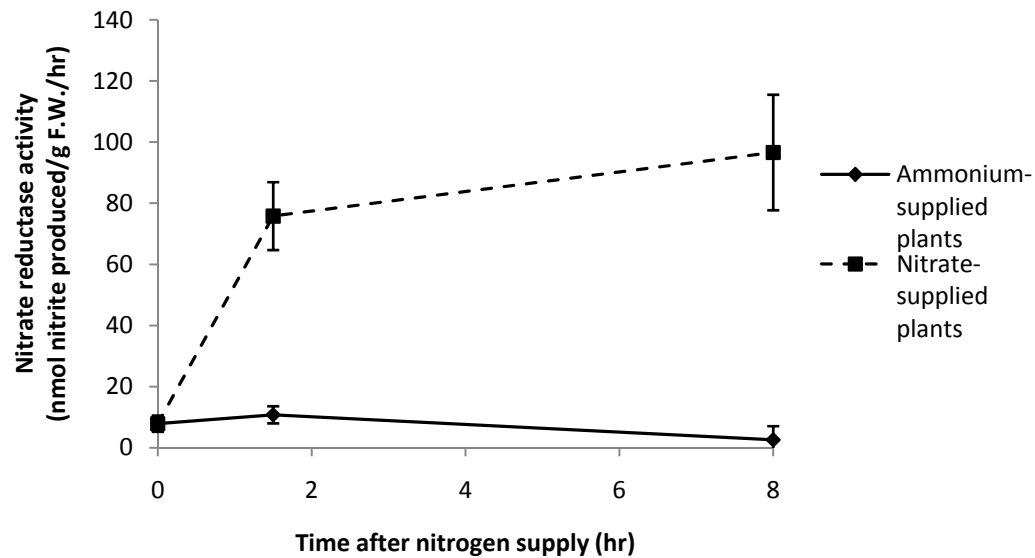

**Supplemental Figure S6:** Nitrate reductase activity in the roots of ammonium-supplied and nitrate-supplied *Arabidopsis* plants. Nitrogen-limited plants were supplied with either ammonium or nitrate for the time periods indicated. Data are presented as means  $\pm$  SEM from three independent experimental replicates.
